# Supplementary material for: CuInS2 quantum dots coated with CdS as high-performance sensitizers for TiO2 electrodes in photoelectrochemical cells
Source: Royal Society of Chemistry journal article supplement (doi:10.1039/c0jm04276e), 2011-01-01
Supplement: c0jm04276e.pdf [file c0jm04276e.pdf]

# Electronic Supplementary Information

## CuInS<sub>2</sub> Quantum Dots Coated with CdS as High-Performance Sensitizers for TiO<sub>2</sub> Electrodes in Photoelectrochemical Cells

By Tzung-Luen Li, Yuh-Lang Lee, and Hsisheng Teng\*

[\*] Prof. Hsisheng Teng, Prof. Yuh-Lang Lee, Mr. Tzung-Luen Li  
Department of Chemical Engineering and Center for Micro/Nano Science and Technology, National Cheng Kung University, Tainan 70101, Taiwan  
E-mail: [hteng@mail.ncku.edu.tw](mailto:hteng@mail.ncku.edu.tw)  
Telephone: 886-6-2385371, Fax: 886-6-2344496

### Determination of the electron transfer rate constant, $k_{et}$

We estimate the rate constant of electron injection from CuInS<sub>2</sub> quantum dots (QDs) into TiO<sub>2</sub> based on an empirical equation derived from estimation of the driving force-dependent rate constant in the CdSe–TiO<sub>2</sub> system reported by Kamat et al.<sup>1</sup> In the determination of the rate constants they first measured the time-resolved recovery of absorption bleaching recorded at the bleaching maximum following 387 nm laser pulse excitation of different size CdSe QDs with and without linking to TiO<sub>2</sub> particles via mercaptopropionic acid bifunctional molecule. The multiexponential of recovery was analyzed using a universal stretch exponential kinetic expression:

$$\Delta A(t) = \Delta A(0) \times \exp[-(t/\tau)^\beta]$$

where  $\tau$  is the characteristic lifetime,  $\beta$  value fitted is in the 0.4–0.5 range, and  $A$  is the bleaching of absorption. An enhanced recovery was observed with decreasing QD size. Assuming that photoexcited electron in CdSe transferred to the conduction band of TiO<sub>2</sub> is the only additional deactivation pathway, the rate constant can be estimated by comparing the recovery lifetimes and given by the following equation:

$$k_{\text{et}} = 1/\tau_{(\text{CdSe}+\text{TiO}_2)} - 1/\tau_{(\text{CdSe})}$$

where  $\tau_{(\text{CdSe}+\text{TiO}_2)}$  and  $\tau_{(\text{CdSe})}$  represent the recovery lifetimes of QDs with and without linking to the  $\text{TiO}_2$  particles, respectively. Based on this estimation principle, Figure S1 shows the driving force-dependent rate constant as a function of the conduction band energy difference between the sensitizer and  $\text{TiO}_2$ .<sup>1</sup> We use the correlation shown in Figure S1 to estimate the  $k_{\text{et}}$  values of electron injection from  $\text{CuInS}_2$  QDs to  $\text{TiO}_2$ .

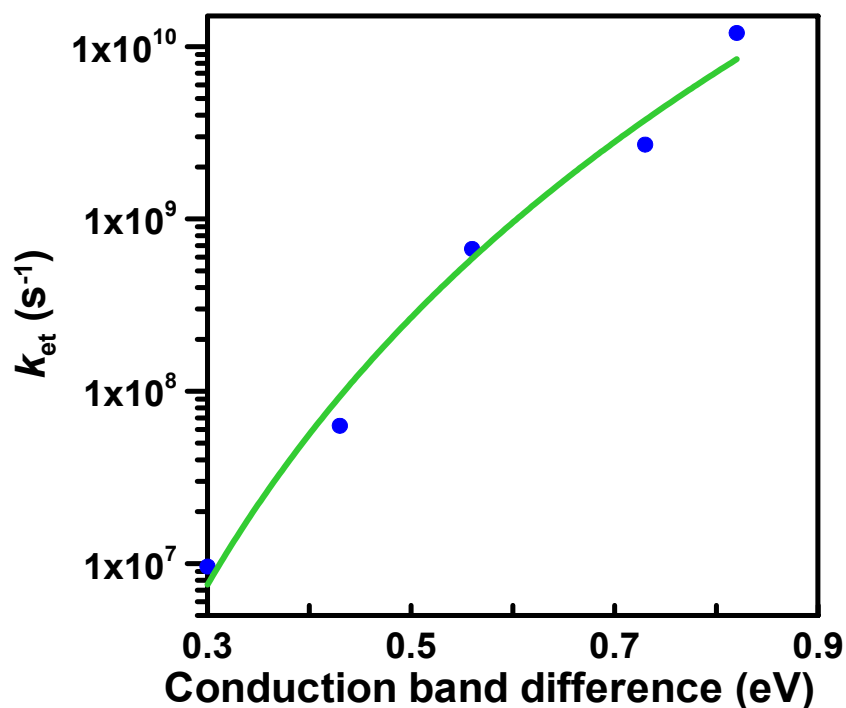

Fig. S1 Plot of electron transfer rate constant vs. conduction band energy difference between QD sensitizer and  $\text{TiO}_2$ . This correlation is determined based on CdSe– $\text{TiO}_2$  system.

### Effect of coating ZnS on CuInS<sub>2</sub> QDs

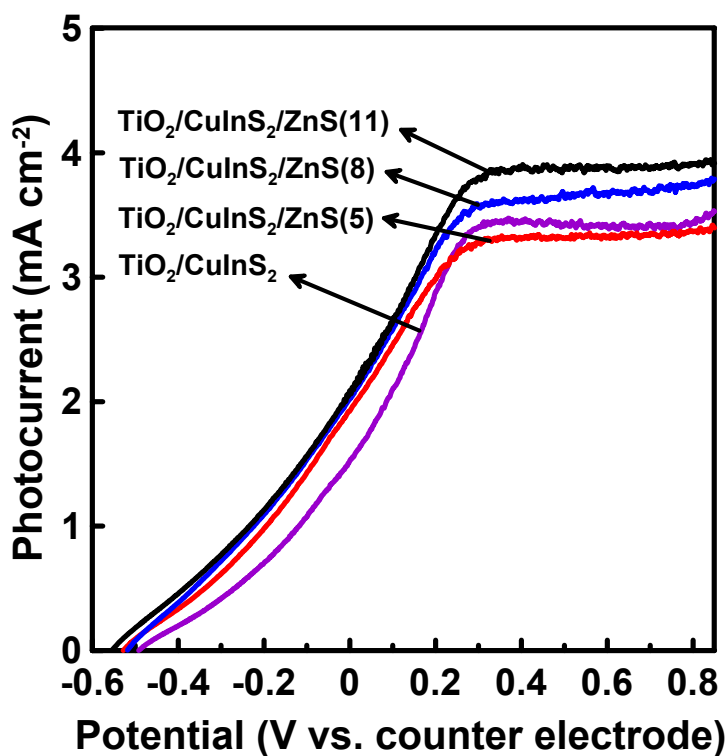

Fig. S2 Photocurrent density versus bias potential ( $I-V$  characteristics) of the TiO<sub>2</sub> nanocrystalline films with varying sensitization levels of ZnS under 100 mW cm<sup>-2</sup> AM 1.5G illumination. The size of CuInS<sub>2</sub> QDs is 3.5 nm. The concentration of Zn(NO<sub>3</sub>)<sub>2</sub> and Na<sub>2</sub>S in the SILAR deposition of ZnS is 0.05 M, the solvent used is ethanol and methanol, respectively.

### References

1. I. Robel, M. Kuno and P. V. Kamat, *J. Am. Chem. Soc.*, 2007, **129**, 4136.
